# Supplementary material for: Safety, tolerability, and efficacy of repeated doses of dihydroartemisinin-piperaquine for prevention and treatment of malaria: a systematic review and meta-analysis
Source: PubMed Central journal article supplement (PMC5266794; doi:10.1016/s1473-3099(16)30378-4), 2017-02
Supplement: mmc1.pdf [file mmc1.pdf]

# THE LANCET Infectious Diseases

## Supplementary webappendix

This webappendix formed part of the original submission and has been peer reviewed.  
We post it as supplied by the authors.

Supplement to: Gutman J, Kovacs S, Dorsey G, Stergachis A, ter Kuile FO.  
Safety, tolerability, and efficacy of repeated doses of dihydroartemisinin-piperaquine  
for prevention and treatment of malaria: a systematic review and meta-analysis.  
*Lancet Infect Dis* 2016; published online Nov 16. [http://dx.doi.org/10.1016/S1473-3099\(16\)30378-4](http://dx.doi.org/10.1016/S1473-3099(16)30378-4).

# The safety, tolerability and efficacy of repeated doses of dihydroartemisinin-piperaquine for the prevention and treatment of malaria: A systematic review and meta-analysis

## Supplementary Web Appendix

Julie Gutman, MD, Stephanie Kovacs, PhD, Professor Grant Dorsey, MD PhD, Professor Andy Stergachis, PhD, Professor Feiko O. ter Kuile, MD PhD

### Table of Contents

|                                                                                                                                                       |    |
|-------------------------------------------------------------------------------------------------------------------------------------------------------|----|
| Supplemental Text .....                                                                                                                               | 2  |
| Supplemental References .....                                                                                                                         | 2  |
| Table S1. PICOTS framework.....                                                                                                                       | 3  |
| Table S2. PubMed search strategy.....                                                                                                                 | 3  |
| Figure S1: Bias assessment of randomized-controlled trials using the Cochrane Collaboration tool ....                                                 | 4  |
| Figure S2: Pooled incidence rate ratio for any parasitemia, monthly dihydroartemisinin-piperaquine versus placebo stratified by bias assessment ..... | 5  |
| Figure S3: Pooled incidence rate ratio for any parasitemia, monthly dihydroartemisinin-piperaquine versus placebo stratified by geography .....       | 6  |
| Figure S4: Pooled odds ratio for any hospitalization, dihydroartemisinin-piperaquine compared to other drugs and placebo .....                        | 7  |
| Figure S5: Pooled risk difference for death with dihydroartemisinin-piperaquine versus comparators8                                                   |    |
| Figure S6: Pooled relative risk for loss to follow-up for dihydroartemisinin-piperaquine versus comparators.....                                      | 9  |
| Figure S7: Pooled relative risk for vomiting after receiving a dose of dihydroartemisinin-piperaquine compared to other drugs and placebo .....       | 10 |
| Figure S8: Pooled relative risk for any diarrhea, dihydroartemisinin-piperaquine versus comparator therapies .....                                    | 11 |
| Figure S9: Pooled relative risk for any rash, dihydroartemisinin-piperaquine versus comparator therapies .....                                        | 12 |

## Supplemental Text

We conducted our search, analyses, and reporting adhering to the PRISMA guidelines for systematic reviews and meta-analyses.<sup>1</sup> An electronic literature search applying the PICOTS framework was conducted of the following clinical databases: MEDLINE, EMBASE, Web of Science, Scopus, CINAHL Plus, the Cochrane Library databases, WHO Global Health Library and the Malaria in Pregnancy Consortium (MiPc) Library.<sup>2</sup> A multi-concept Boolean search strategy was applied using keywords and MeSH terms. We additionally searched 'gray literature' databases, conference abstracts, manually reviewed reference lists of selected publications as well as records recommended by contacting experts so as to encompass a broad range of available literature. We imported all into EndNote Web (Thompson Reuters, NY), removed duplicates, and screened each record against the eligibility criteria.

Data on the study population, including age, severity of malaria, drug exposures, treatment outcomes (including protective efficacy and the incidence of any parasitemia after treatment with DP), tolerability, and all serious adverse events were abstracted. We also used measures of lost to follow-up, drop-outs and adherence as surrogates of tolerability.

## Supplemental References

1. Liberati A, Altman DG, Tetzlaff J, et al. The PRISMA statement for reporting systematic reviews and meta-analyses of studies that evaluate healthcare interventions: explanation and elaboration. *BMJ* 2009; **339**: b2700.
2. van Eijk AM, Hill J, Povall S, Reynolds A, Wong H, Ter Kuile FO. The Malaria in Pregnancy Library: a bibliometric review. *Mal J* 2012; **11**: 362.

**Table S1. PICOTS framework**

| <b>Components</b>   | <b>Characteristics</b>                                                                                                                                                                                                                                                                                                                                                                                                                                              |
|---------------------|---------------------------------------------------------------------------------------------------------------------------------------------------------------------------------------------------------------------------------------------------------------------------------------------------------------------------------------------------------------------------------------------------------------------------------------------------------------------|
| <b>Population</b>   | All persons at risk for malaria or with malaria infections<br>-Subgroup analyses: <ul style="list-style-type: none"> <li>• Malaria transmission intensity</li> <li>• Geography (Southeast Asia, Sub-Saharan Africa)</li> <li>• Target groups (infants, children, pregnant women, and adults)</li> <li>• Number of doses</li> </ul>                                                                                                                                  |
| <b>Intervention</b> | Exposed to repeat DP for treatment or prevention of malaria                                                                                                                                                                                                                                                                                                                                                                                                         |
| <b>Control</b>      | Exposed to another ACT or antimalarial for treatment, to SP for prevention, or placebo                                                                                                                                                                                                                                                                                                                                                                              |
| <b>Outcomes</b>     | Serious Adverse Events including but not limited to: <ol style="list-style-type: none"> <li>1. Death</li> <li>2. Any event leading to hospitalization</li> <li>3. QT prolongation</li> <li>4. Adverse pregnancy outcomes (stillbirth, miscarriage, congenital anomalies)</li> </ol> Tolerability: <ol style="list-style-type: none"> <li>1. Vomiting</li> <li>2. Nausea</li> <li>3. Dizziness</li> <li>4. Lost to follow-up, drop-outs or poor adherence</li> </ol> |
| <b>Timing</b>       | No time limits will be placed on the search                                                                                                                                                                                                                                                                                                                                                                                                                         |
| <b>Setting</b>      | Any study in which participants were exposed to DP including case series<br>Limit to English Language                                                                                                                                                                                                                                                                                                                                                               |

**Table S2. PubMed search strategy**

Search date Sept 1, 2016

|          | <b>Framework</b>                            | <b>Search terms</b>                                 | <b>Number of articles</b> |
|----------|---------------------------------------------|-----------------------------------------------------|---------------------------|
| <b>P</b> | <b>Population</b>                           | Human                                               |                           |
| <b>I</b> | <b>Intervention</b>                         | AND<br>Dihydroartemisinin piperaquine OR<br>DHA-PPQ | <b>P + I: 252</b>         |
| <b>C</b> | <b>Control</b>                              | -                                                   |                           |
| <b>O</b> | <b>Outcome</b>                              | -                                                   |                           |
| <b>T</b> | <b>Timing</b>                               | -                                                   |                           |
| <b>S</b> | <b>Setting</b><br>Limit to English language | AND (English [la])                                  | <b>P+I+O+T+S: 244</b>     |

**Figure S1: Bias assessment of randomized-controlled trials using the Cochrane Collaboration tool**

| Study            | Random sequence generation                                                          | Allocation concealment                                                              | Blinding of participants and personnel                                                | Blinding of outcome efficacy assessment                                               | Blinding of safety outcomes                                                           | Incomplete outcome data                                                               |
|------------------|-------------------------------------------------------------------------------------|-------------------------------------------------------------------------------------|---------------------------------------------------------------------------------------|---------------------------------------------------------------------------------------|---------------------------------------------------------------------------------------|---------------------------------------------------------------------------------------|
| Bigira, 2014     |    |    |    |    |    |    |
| Bojang, 2010     |    |    |    |    |    |    |
| Cisse, 2009      |    |    |    |    |    |    |
| Desai, 2015      |    |    |    |    |    |    |
| Kakuru, 2015     |    |    |    |    |    |    |
| Kamya, 2014      |    |    |    |    |    |    |
| Lwin, 2012       |   |   |   |   |   |   |
| Nankabirwa, 2014 |  |  |  |  |  |  |
| Wanzira, 2009    |  |  |  |  |  |  |
| Zongo 2015       |  |  |  |  |  |  |

**Figure S2: Pooled incidence rate ratio for any parasitemia, monthly dihydroartemisinin-piperazine versus placebo stratified by bias assessment**

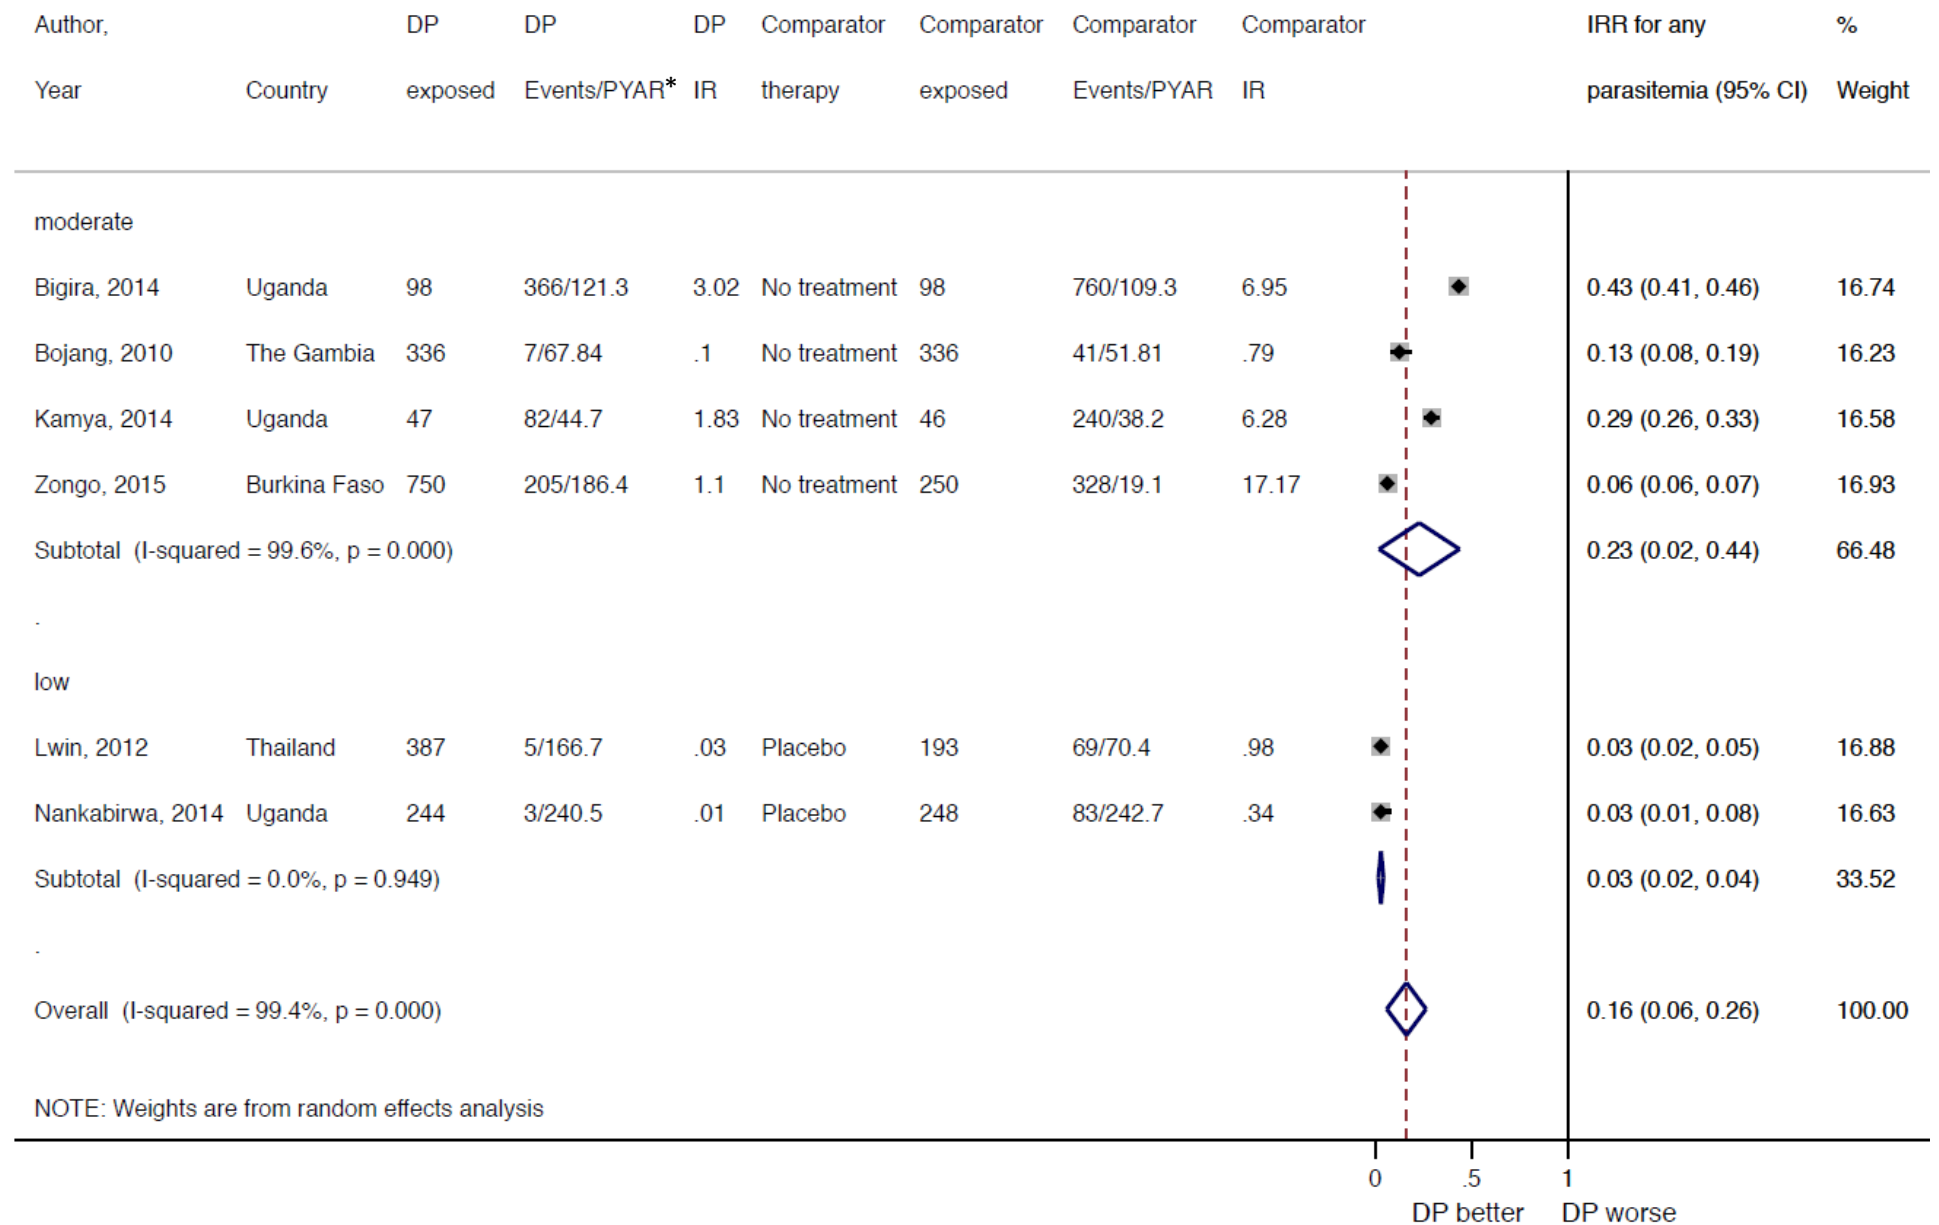

DP dihydroartemisinin-piperazine, PYAR person years at risk, IR incidence rate, IRR incidence rate ratio

\*Two studies, Lwin et al. and Zongo et al., did not report PYAR

**Figure S3: Pooled incidence rate ratio for any parasitemia, monthly dihydroartemisinin-piperaquine versus placebo stratified by geography**

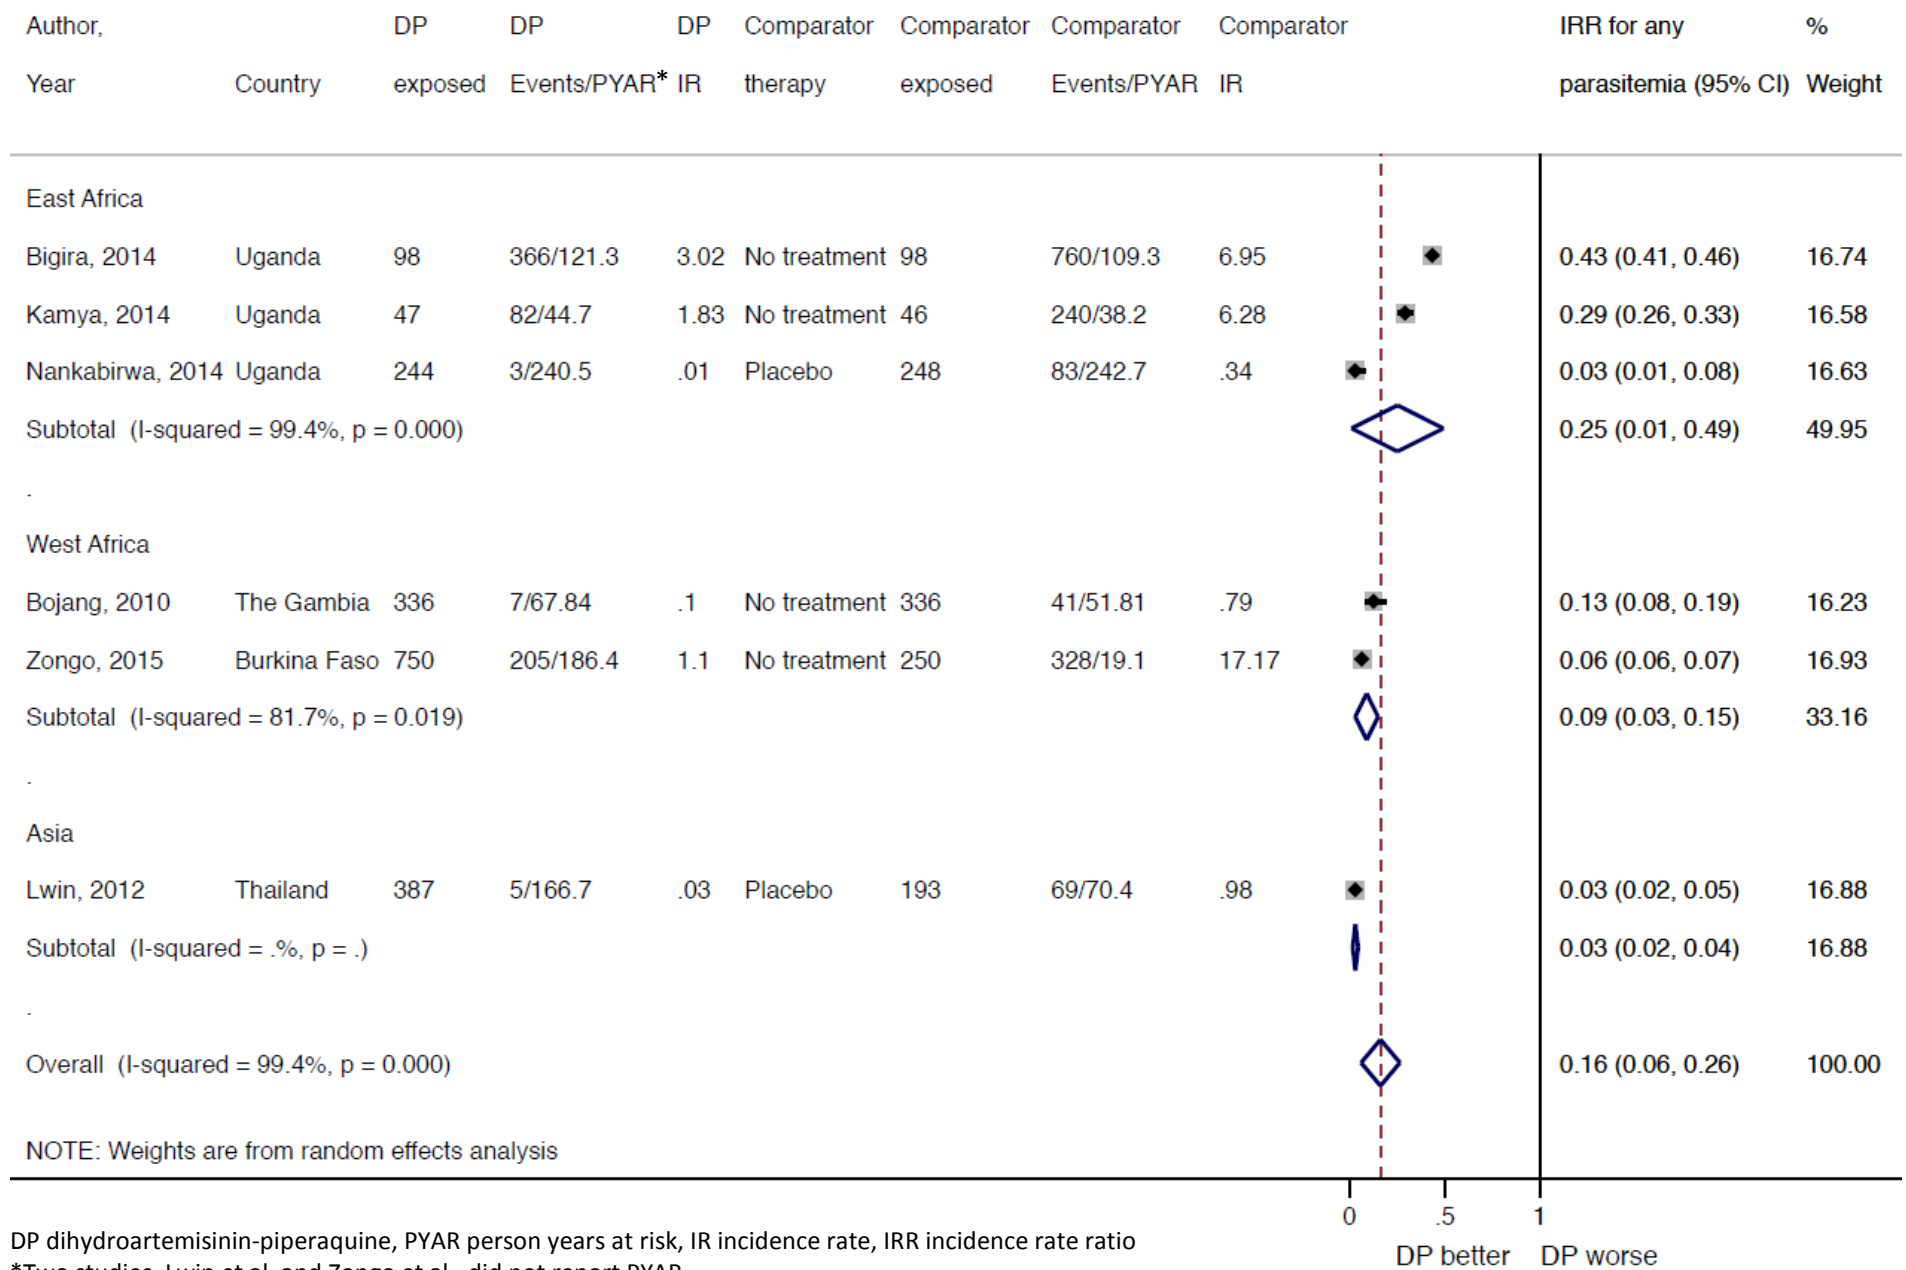

**Figure S4: Pooled odds ratio for any hospitalization, dihydroartemisinin-piperazine compared to other drugs and placebo**

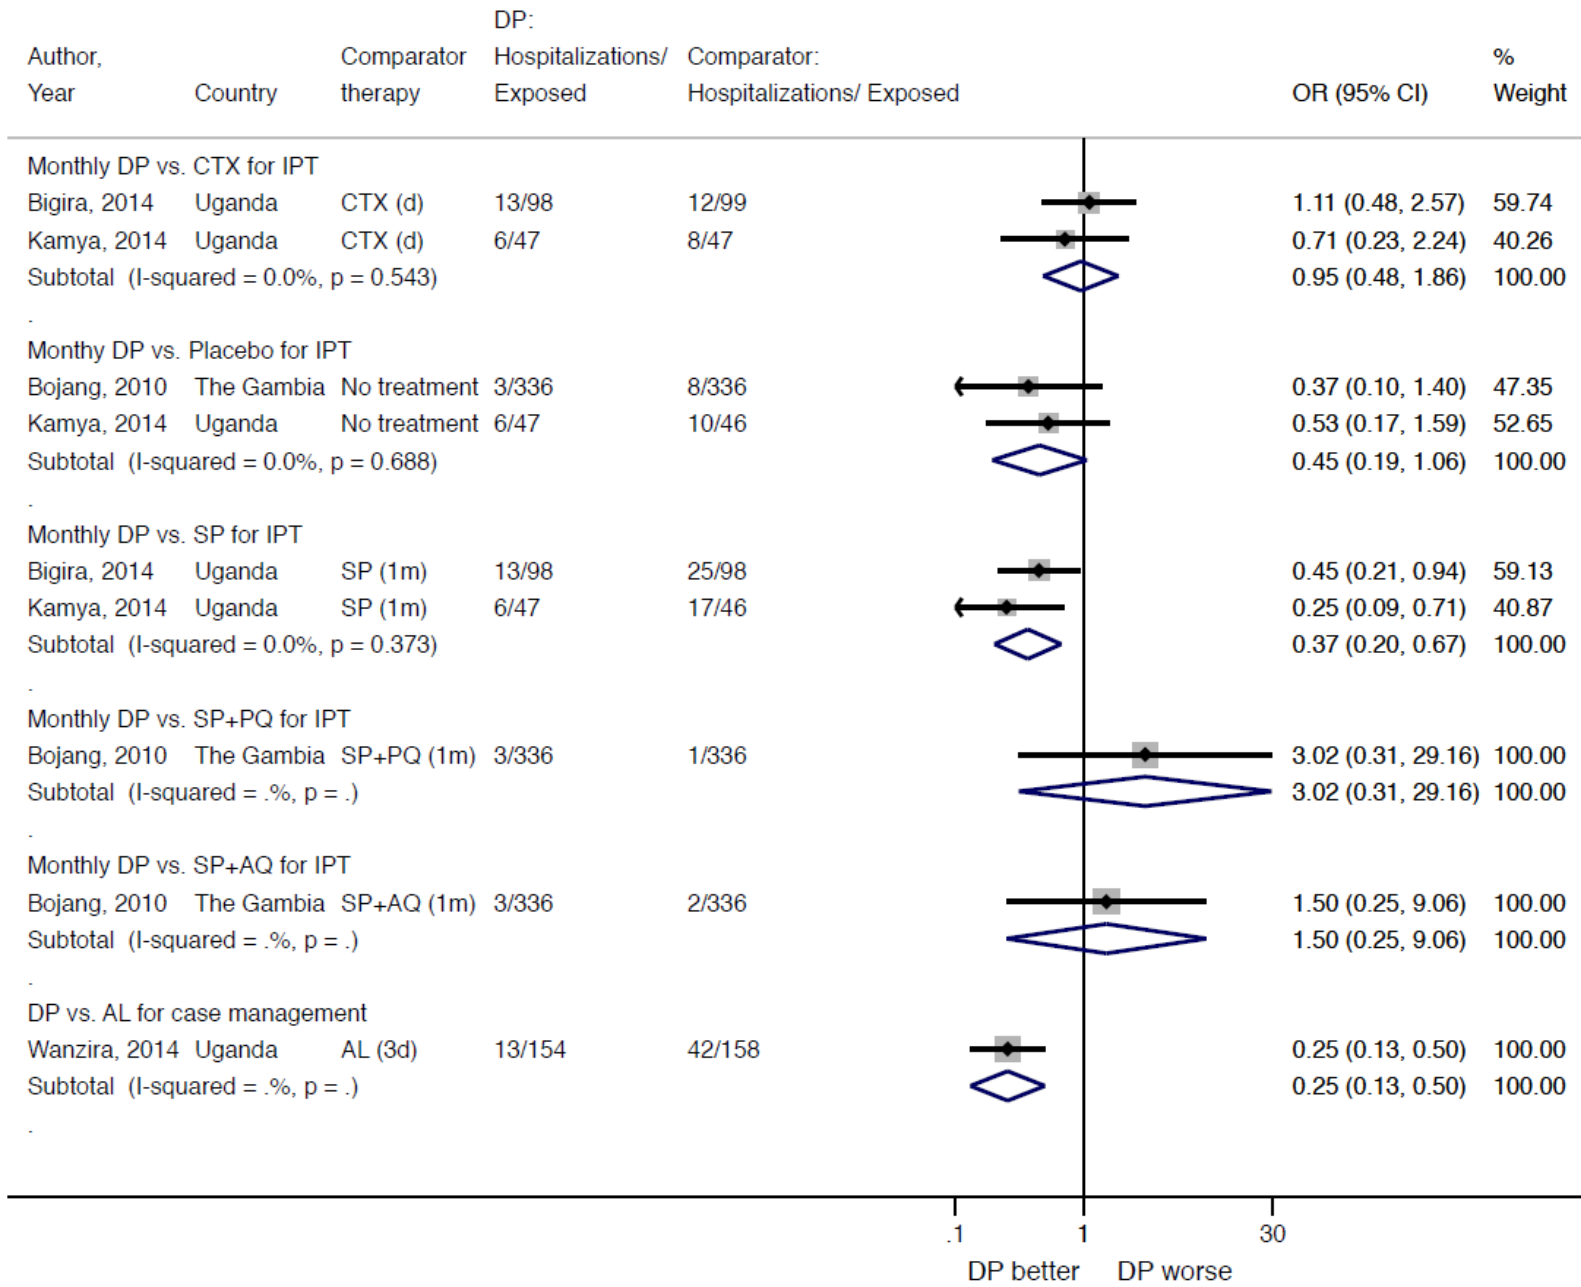

OR odds ratio, DP dihydroartemisinin-piperazine, CTX co-trimoxazole, IPT intermittent preventative treatment, SP sulfadoxine-pyrimethamine, SP+PQ sulfadoxine-pyrimethamine piperazine, SP+AQ sulfadoxine-pyrimethamine amodiaquine, AL artemether-lumefantrine



Figure S5: Pooled risk difference for death with dihydroartemisinin-piperazine versus comparators

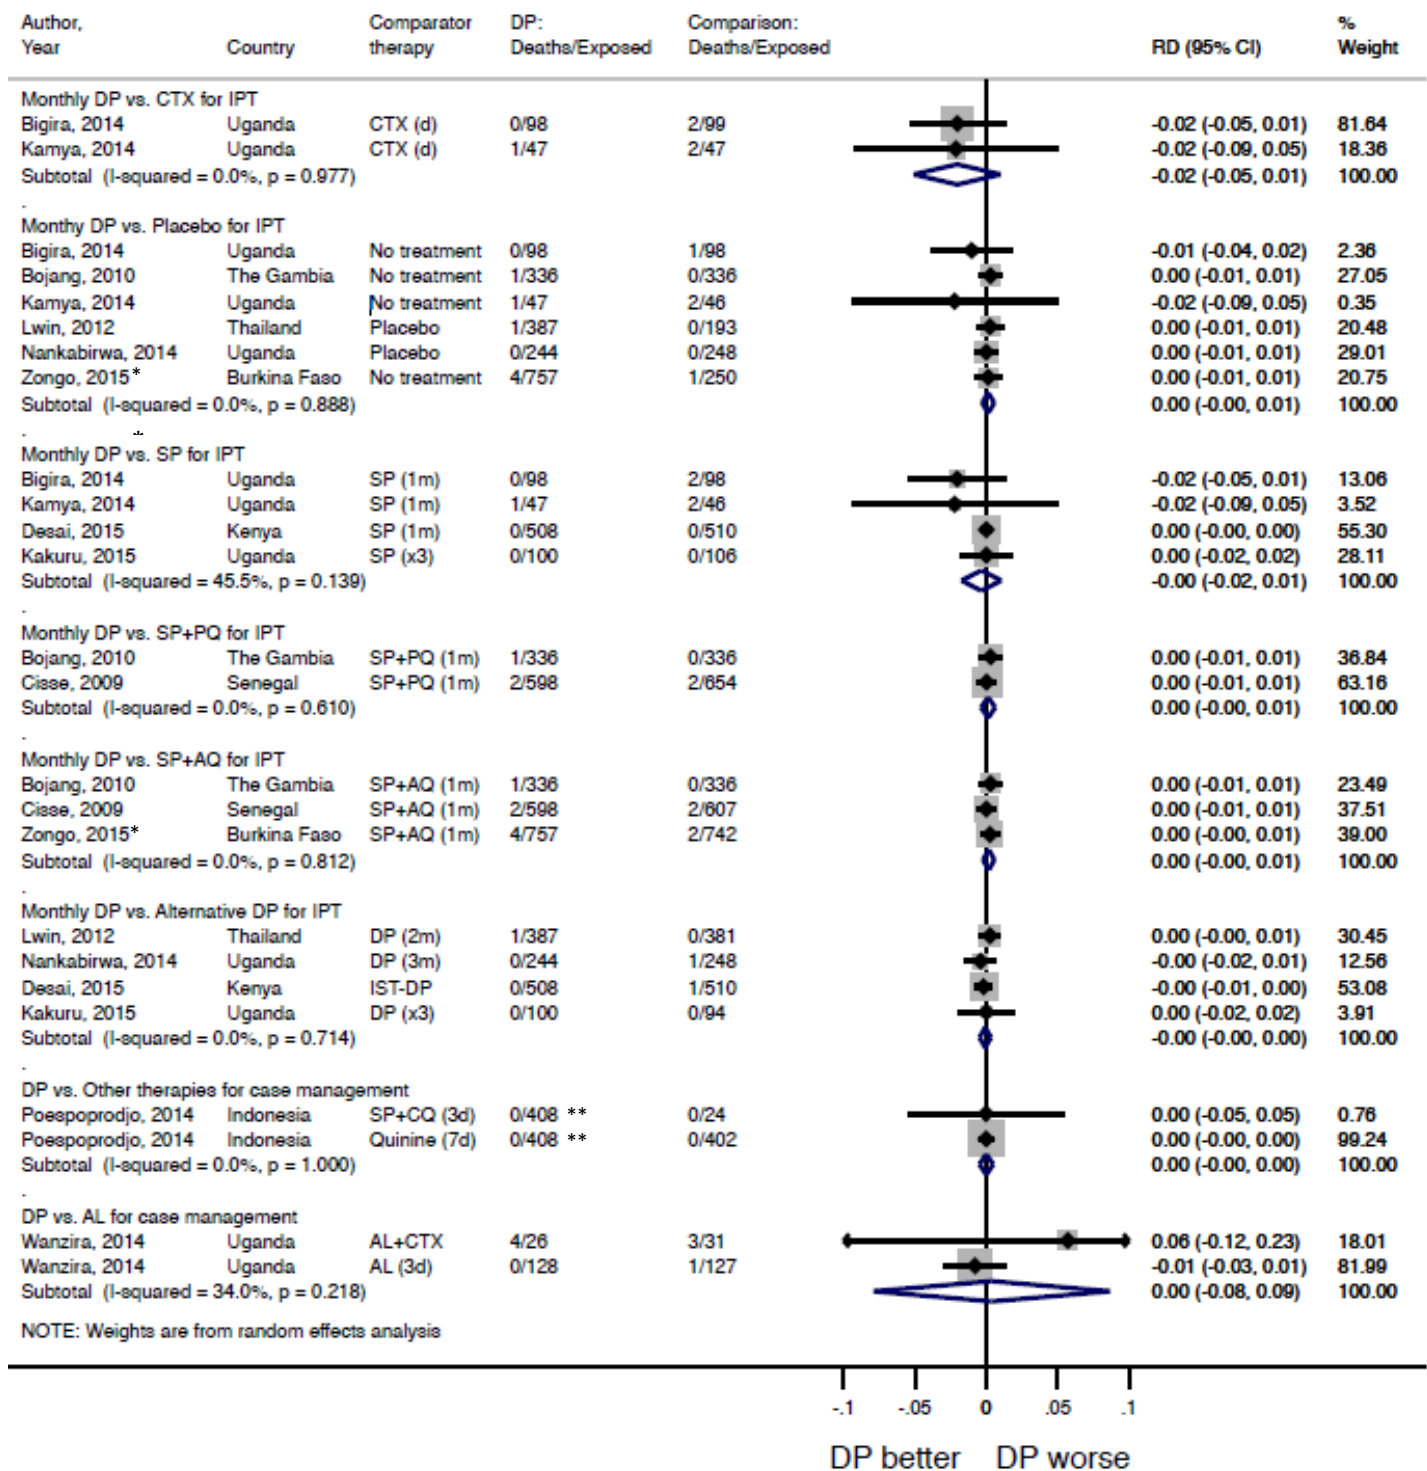

RD risk difference, DP dihydroartemisinin-piperazine, CTX co-trimoxazole, SP sulfadoxine-pyrimethamine, SP+PQ sulfadoxine-pyrimethamine piperazine, SP+AQ sulfadoxine-pyrimethamine amodiaquine, AL artemether-lumefantrine, IPT intermittent preventative treatment, IST intermittent screening and treatment

\*Zongo et al: Numbers are based on actual drug exposures

\*\* Poespoprodjo, et al: Only 64 of 408 DP recipients received  $\geq 2$  courses of DP

**Figure S6: Pooled relative risk for loss to follow-up for dihydroartemisinin-piperazine versus comparators**

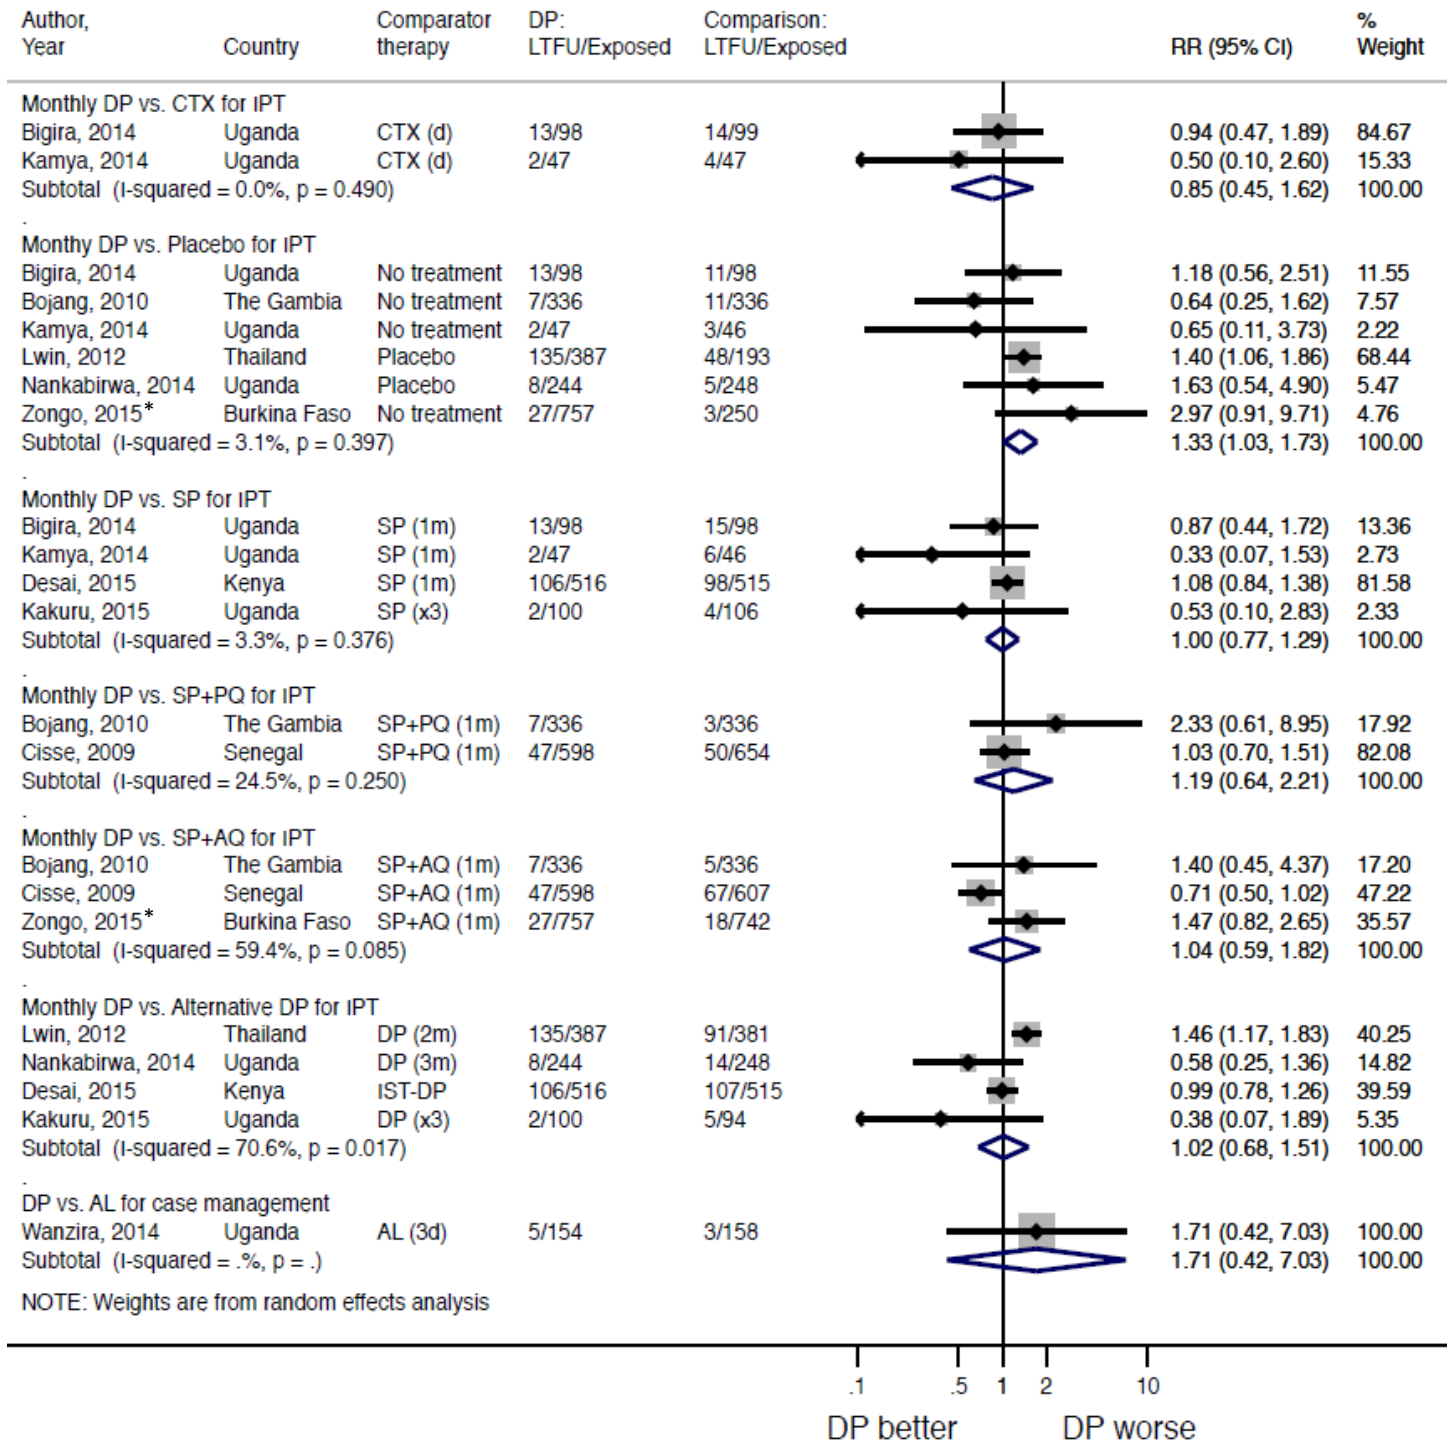

NOTE: Weights are from random effects analysis

RR relative risk, DP dihydroartemisinin-piperazine, CTX co-trimoxazole, SP sulfadoxine-pyrimethamine, SP+PQ sulfadoxine-pyrimethamine piperazine, SP+AQ sulfadoxine-pyrimethamine amodiaquine, AL artemether-lumefantrine, IPT intermittent preventative treatment, IST intermittent screening and treatment, LTFU loss to follow-up

\*Zongo et al: Numbers are based on actual drug exposures

**Figure S7: Pooled relative risk for vomiting after receiving a dose of dihydroartemisinin-piperazine compared to other drugs and placebo**

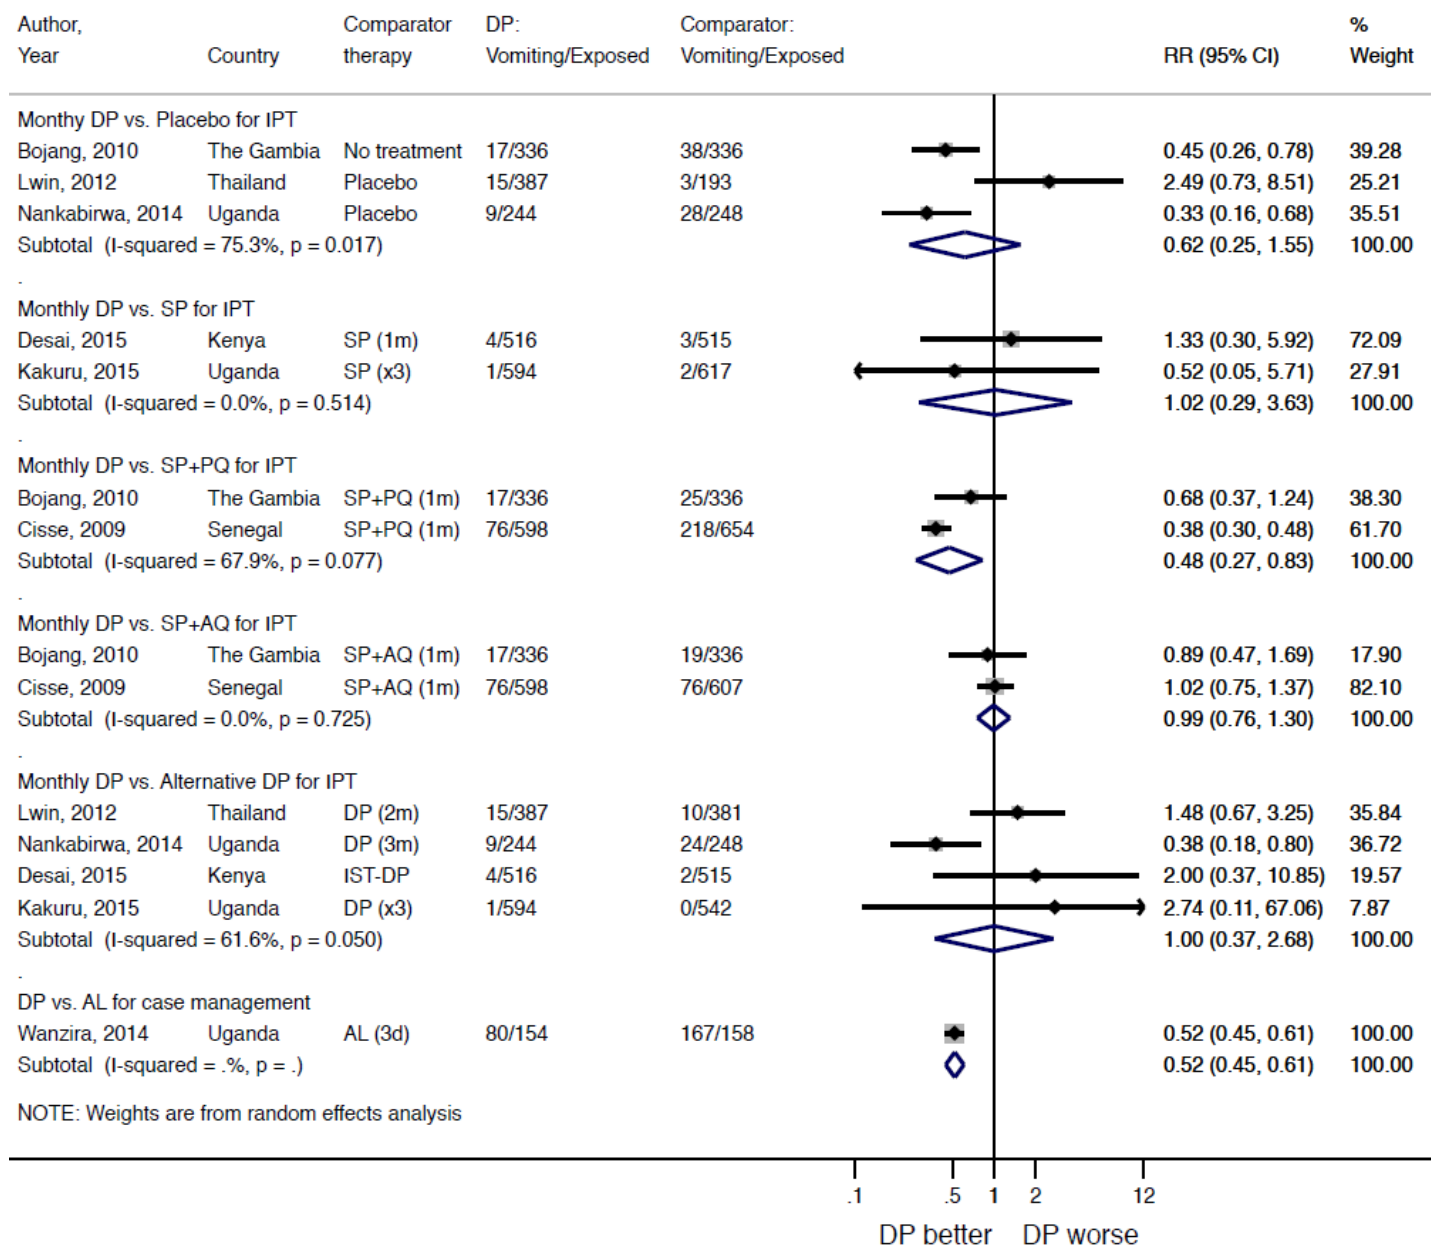

NOTE: Weights are from random effects analysis

RR relative risk, DP dihydroartemisinin-piperazine, IPT intermittent preventative treatment, SP sulfadoxine-pyrimethamine, SP+PQ sulfadoxine-pyrimethamine piperazine, SP+AQ sulfadoxine-pyrimethamine amodiaquine, AL artemether-lumefantrine

**Figure S8: Pooled relative risk for any diarrhea, dihydroartemisinin-piperaquine versus comparator therapies**

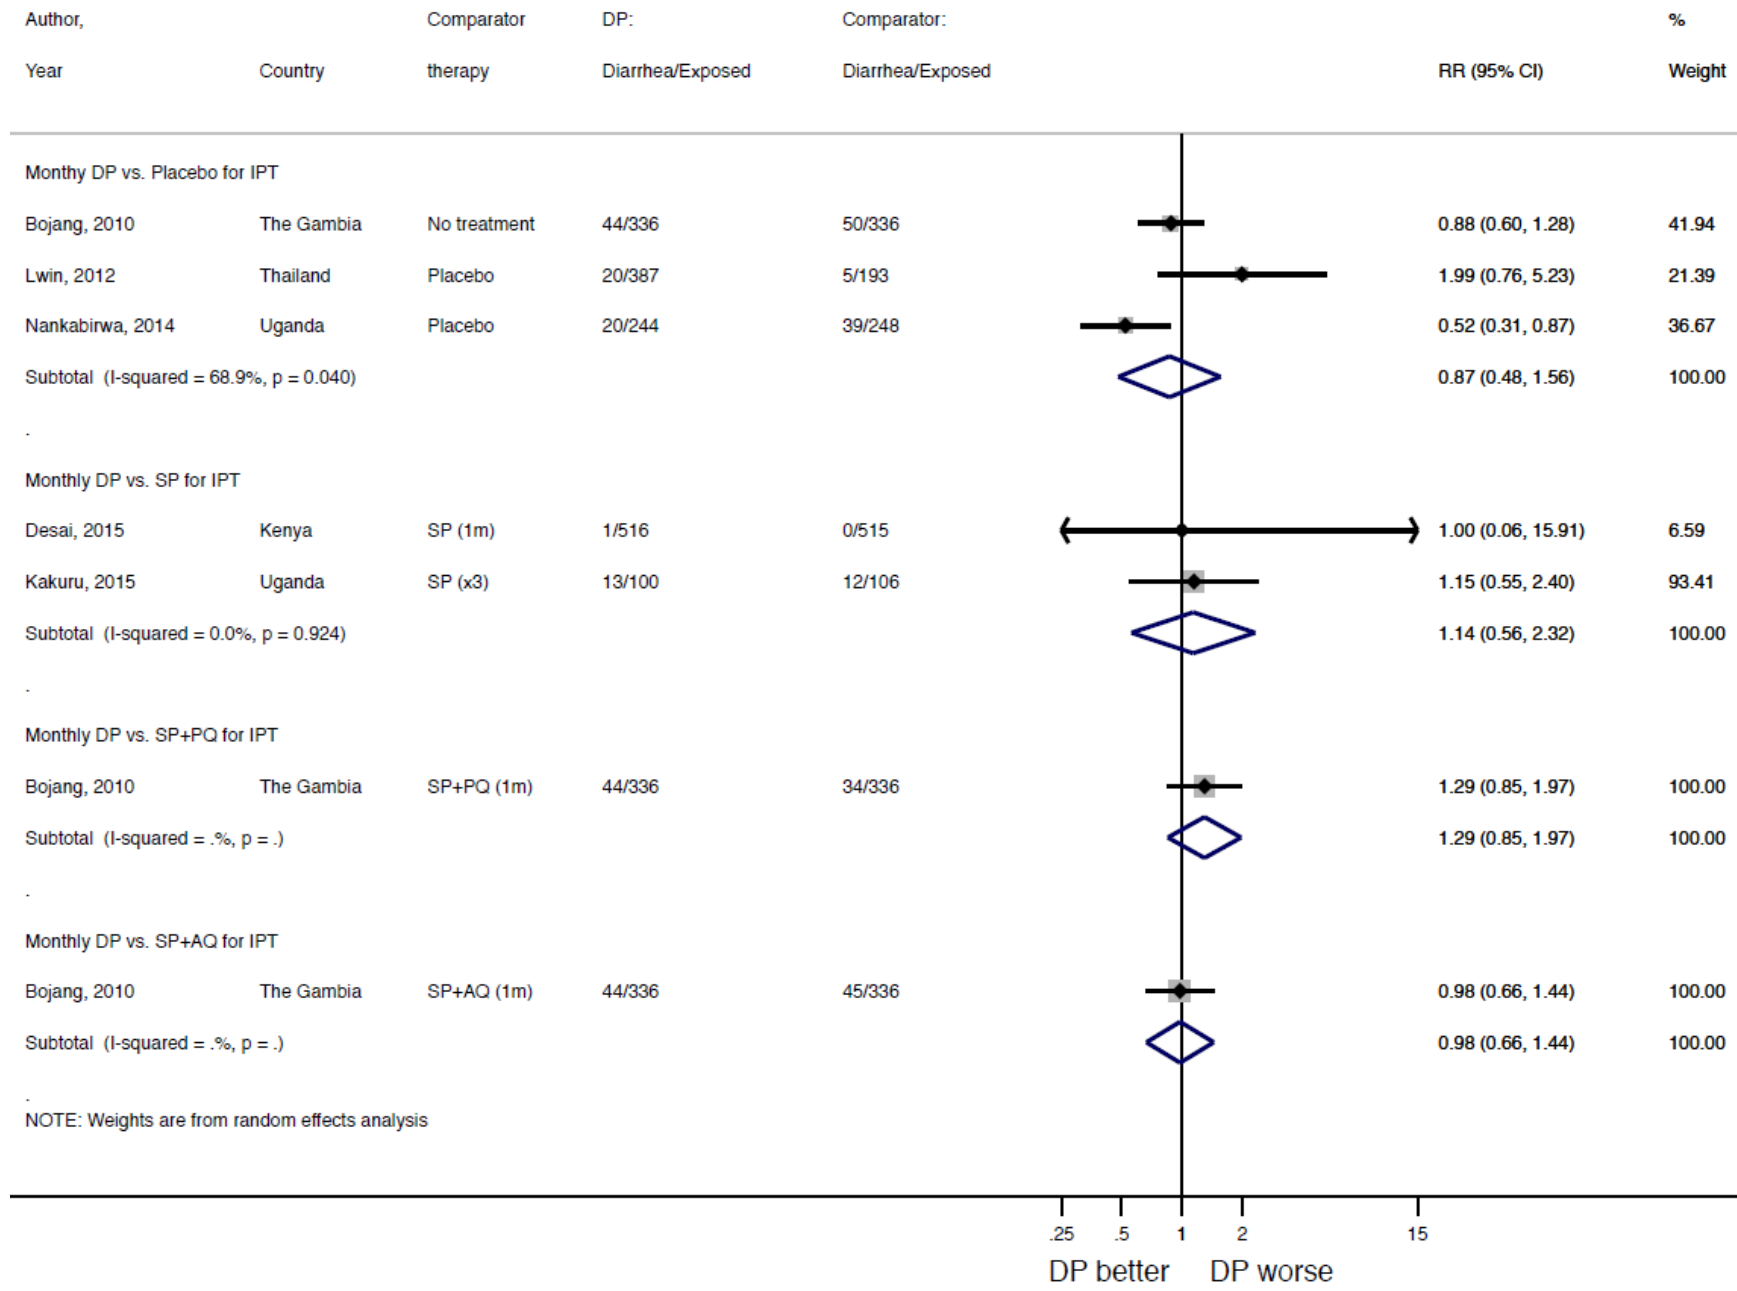

NOTE: Weights are from random effects analysis

RR relative risk, DP dihydroartemisinin-piperaquine, IPT intermittent preventative treatment, SP sulfadoxine-pyrimethamine, SP+PQ sulfadoxine-pyrimethamine piperaquine, SP+AQ sulfadoxine-pyrimethamine amodiaquine

**Figure S9: Pooled relative risk for any rash, dihydroartemisinin-piperazine versus comparator therapies**

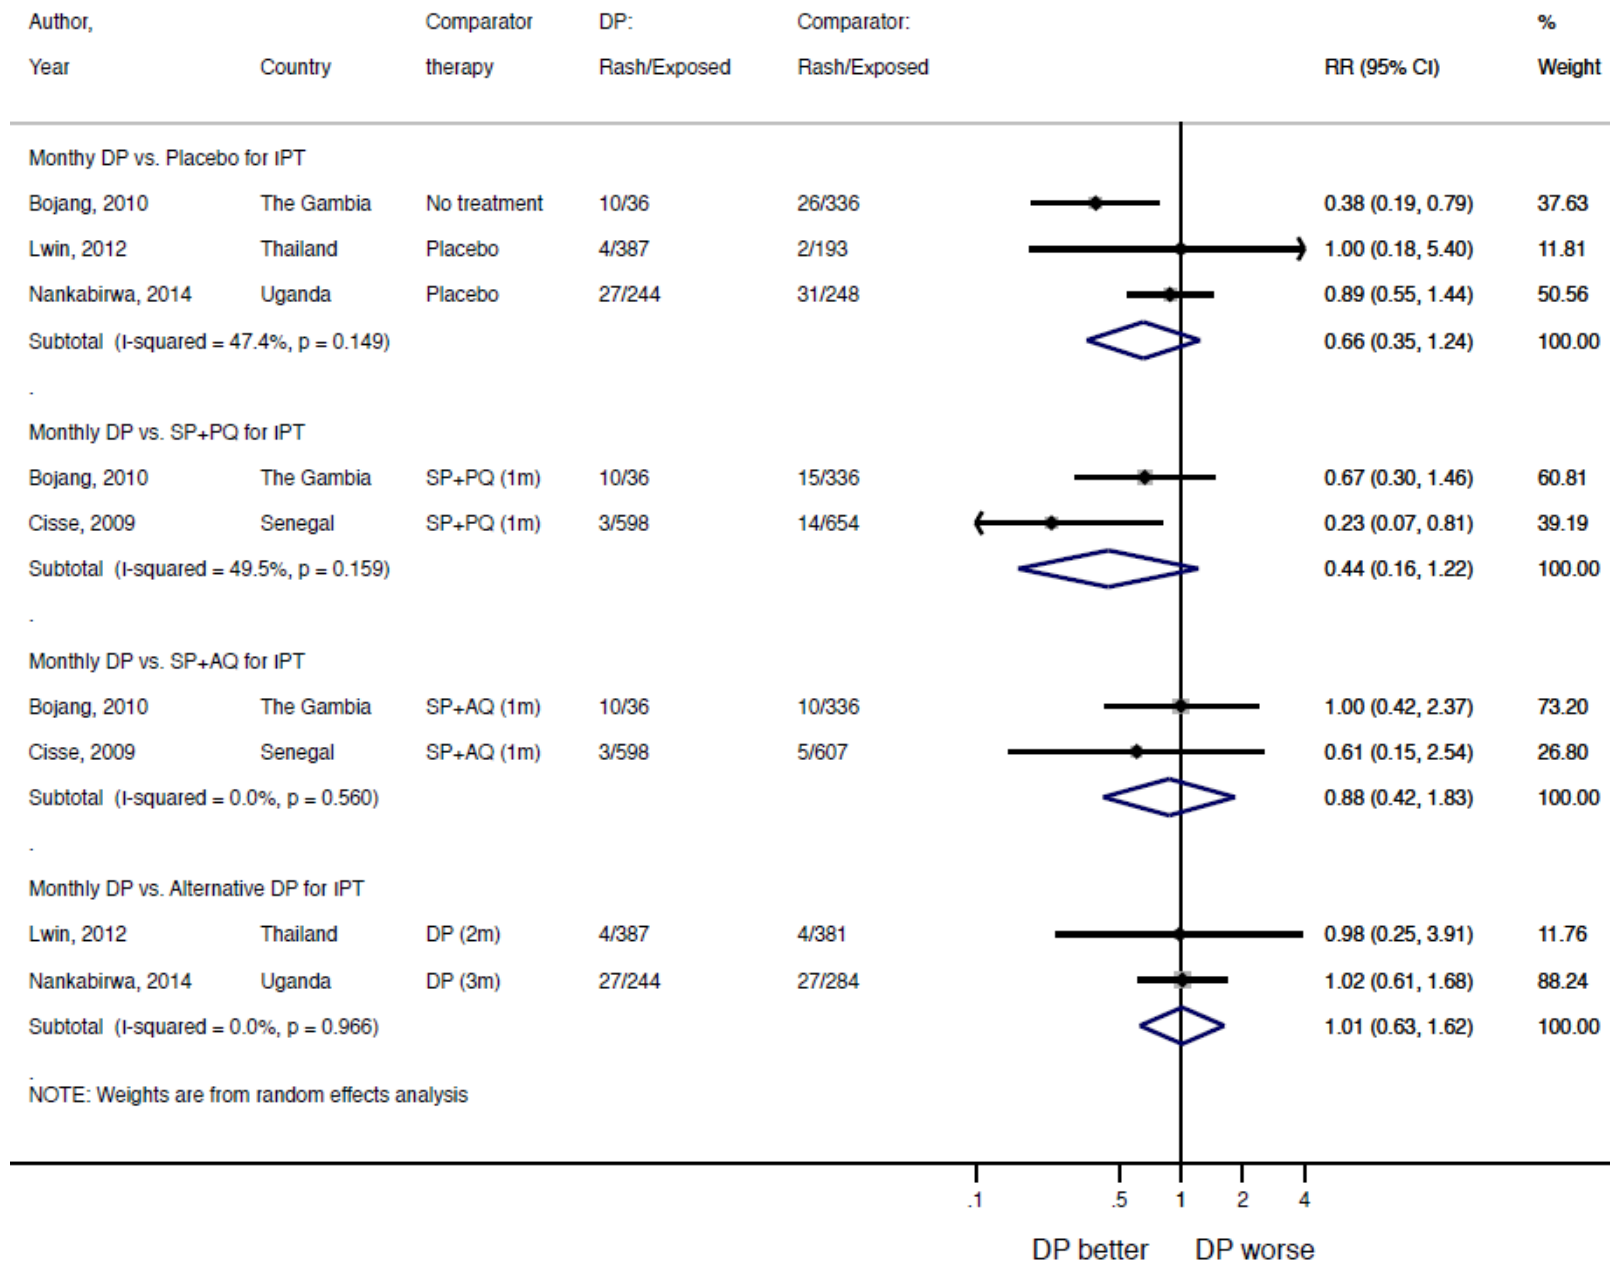

NOTE: Weights are from random effects analysis

RR relative risk, DP dihydroartemisinin-piperazine, SP+PQ sulfadoxine-pyrimethamine piperazine, IPT intermittent preventative treatment, SP+AQ sulfadoxine-pyrimethamine amodiaquine, IST intermittent screening and treatment
